# Supplementary material for: Torrefaction of Pine Using a Pilot-Scale Rotary Reactor: Experimentation, Kinetics, and Process Simulation Using Aspen Plus™
Source: MDPI journal article supplement (doi:10.3390/cleantechnol5020034), 2023-05-17
Supplement: s1 [file s1]

## Supporting Information

### Torrefaction of Pine Using A Pilot-Scale Rotary Reactor: Experimentation, Kinetics, and Process Simulation using Aspen Plus™

Suchandra Hazra<sup>1,2</sup>, Prithvi Morampudi<sup>2</sup>, John C. Prindle<sup>2</sup>, Dhan Lord B. Fortela<sup>2,3</sup>, Rafael Hernandez<sup>2,3</sup>, Mark E. Zappi<sup>2,3</sup>, and Prashanth R. Buchireddy<sup>2,3\*</sup>

**Table S1.** Condensable species recovered from the torrefaction of pinewood at various temperatures.

| Process                    | Type of reactor         | Method of analysis                                                                | Species analyzed                                                                                                                                                      | References |
|----------------------------|-------------------------|-----------------------------------------------------------------------------------|-----------------------------------------------------------------------------------------------------------------------------------------------------------------------|------------|
| Torrefaction               | 3L Laboratory reactor   | GC                                                                                | Water, acetic acid, methanol, formic acid, and furfural.                                                                                                              | [1]        |
| Torrefaction               | Batch reactor           | HPLC with Chrompack organic acid column, with detection based on refraction index | Water, acetic acid, methanol, formic acid, lactic acid, furfural, 2-propanone, 1-hydroxy-, and phenol.                                                                | [2]        |
| Torrefaction and pyrolysis | TGA                     | FTIR                                                                              | Water, acetic acid, methanol, formic acid, lactic acid, and furfural.                                                                                                 | [3]        |
| Torrefaction               | TGA                     | FTIR                                                                              | Acetaldehyde, formaldehyde, acetic acid, formic acid, methanol, and methane.                                                                                          | [4]        |
| Torrefaction               | Batch reactor           | Infrared gas analysis (Gasboard-5110)                                             | Water, acetic acid and other oxygenates.                                                                                                                              | [5]        |
| Torrefaction               | TGA                     | GC-MS (Perkin Elmer Clarus 500)                                                   | Acetic acid, acetic anhydride, furfural, and 3-methylbutanol.                                                                                                         | [4]        |
| Torrefaction               | Thermal desorption tube | GC-MS and TD (Perkin Elmer Turbomatrix)                                           | Acetic acid, furfural, methylfurfural, hydroxymethylfurfural, phenol, 2-methoxy-, phenol, 2,6-dimethoxy-, vanillin, syringaldehyde, acetovanillin, and acetosyringon. | [6]        |
| Torrefaction               | Batch reactor           | GC-MS (Agilent 6890 and 5973)                                                     | Phenol, pheno, 2-methoxy, phenol, 4-methyl-, eugenol, and vanillin.                                                                                                   | [7]        |
| Torrefaction               | Batch reactor           | GC-MS                                                                             | Acetaldehyde, acetic acid, formaldehyde,                                                                                                                              | [4]        |

|                            |                                    |                                                                                     |                                                                                                                                                                                                                                                                                                                                                       |      |
|----------------------------|------------------------------------|-------------------------------------------------------------------------------------|-------------------------------------------------------------------------------------------------------------------------------------------------------------------------------------------------------------------------------------------------------------------------------------------------------------------------------------------------------|------|
|                            |                                    |                                                                                     | formic acid, 2-furanmethanol, furfural, glycolaldehyde dimer, 2-propanone,1-hydroxy-, and propanoic acid                                                                                                                                                                                                                                              |      |
| Torrefaction               | TGA                                | TGA coupled with MS                                                                 | Water, acetic acid, formic acid, formaldehyde, chloromethane, hydrogen sulphide, and carbonyl sulphide                                                                                                                                                                                                                                                | [8]  |
| Torrefaction and pyrolysis | Auger reactor                      | Karl Fischer titration (Metrohm, 787KF Titrino) for water; GC-FID (Agilent HP 4890) | Water, acetic acid, 2 cyclopenten-1-one, 2-propanone,1-hydroxy-, propanoic acid, 2-furanmethanol, phenol, phenol,4-ethyl- 2-methoxy-, phenol,2-methoxy-, eugenol, isoeugenol, and vanillin.                                                                                                                                                           | [9]  |
| Torrefaction               | Batch reactor                      | GC-MS and GC-FID                                                                    | Formaldehyde, acetaldehyde, acetone, methanol, ethanol, glycolaldehyde, acetic acid, water, glyoxal, lactic acid, and formic acid.                                                                                                                                                                                                                    | [10] |
| Torrefaction               | Batch reactor                      | Karl Fischer titration (Mettler Toledo V20), GC-MS (Agilent 6890 and 5975)          | Acetic acid, formaldehyde, formic acid, 2-furanmethanol, furfural, glycolaldehyde dimer, 2-propanone,1-hydroxy-, and propanoic acid.                                                                                                                                                                                                                  | [11] |
| Torrefaction               | Batch reactor                      | FTIR (Nicolet Magna-IR 550)                                                         | Water, acetic acid, formic acid, formaldehyde, furfural, and methanol.                                                                                                                                                                                                                                                                                | [4]  |
| Torrefaction               | Laboratory-scale fixed-bed reactor | Micro-GC, Karl Fischer titrator and GC-MS                                           | Water, acetic acid, 2-propanone,1-hydroxy-, methanol, glycoaldehyde dimer, 2-furanmethanol, formic acid, formaldehyde, 2-methoxy-4-vinylphenol, 2-butanone,1-hydroxy-, furfural, 1-acetyloxy-2-propanone, propanoic acid, levoglucosan, 3-methyl-1,2-cyclopentanedione, isoeugenol, 2,6-dimethoxyphenol, phenol-2-methoxy-, CO <sub>2</sub> , and CO. | [12] |

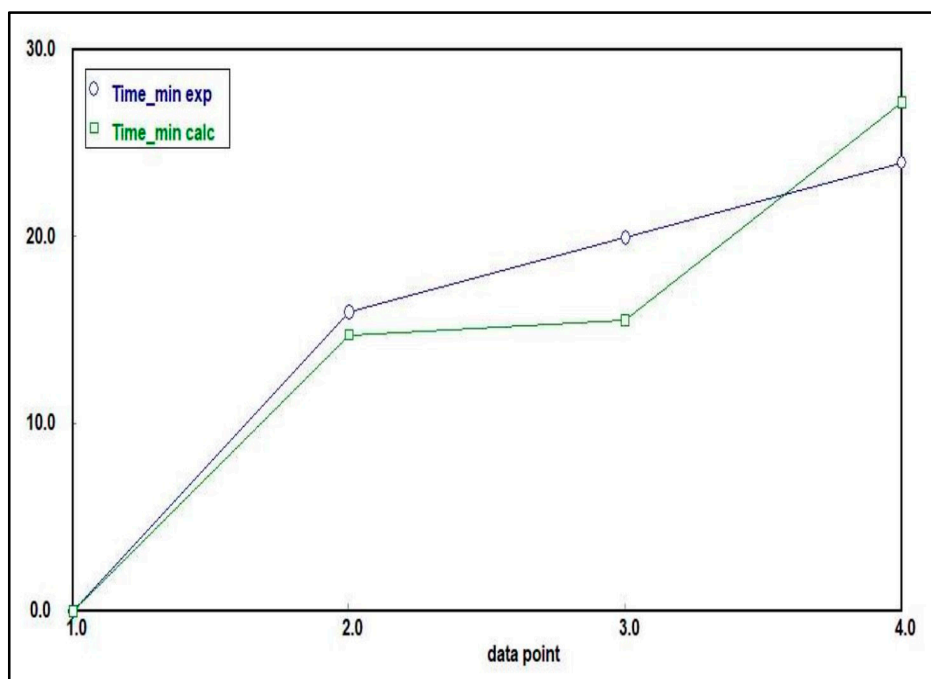

**Figure S1. a.** Polymath graphs showing the fitting of carbon data at 232°C (experiment vs. calculated).

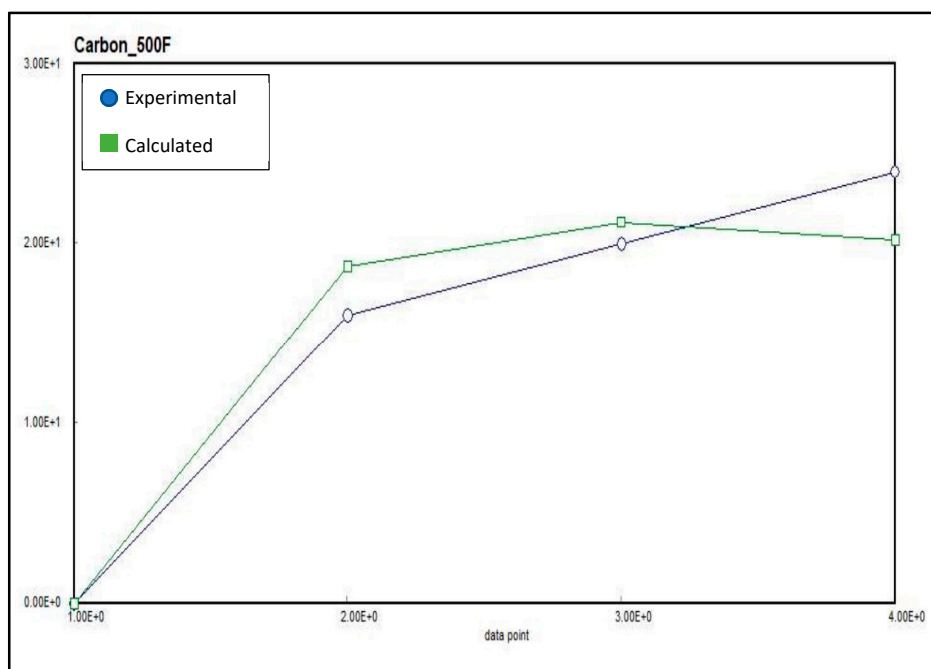

**Figure S1. b.** Polymath graphs showing the fitting of carbon data at 260°C (experiment vs. calculated).

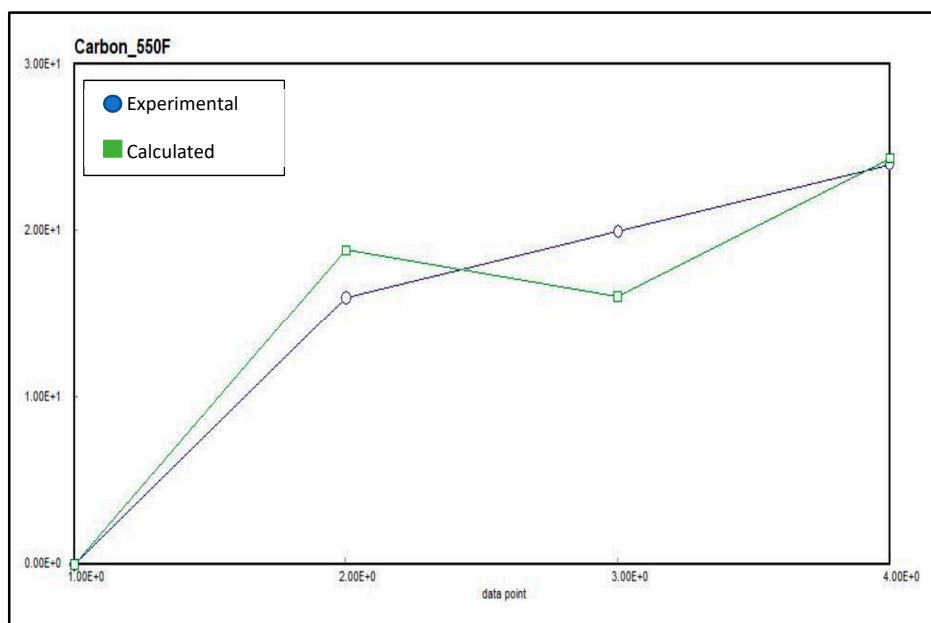

**Figure S1. c.** Polymath graphs showing the fitting of carbon data at 288°C (experiment vs. calculated).

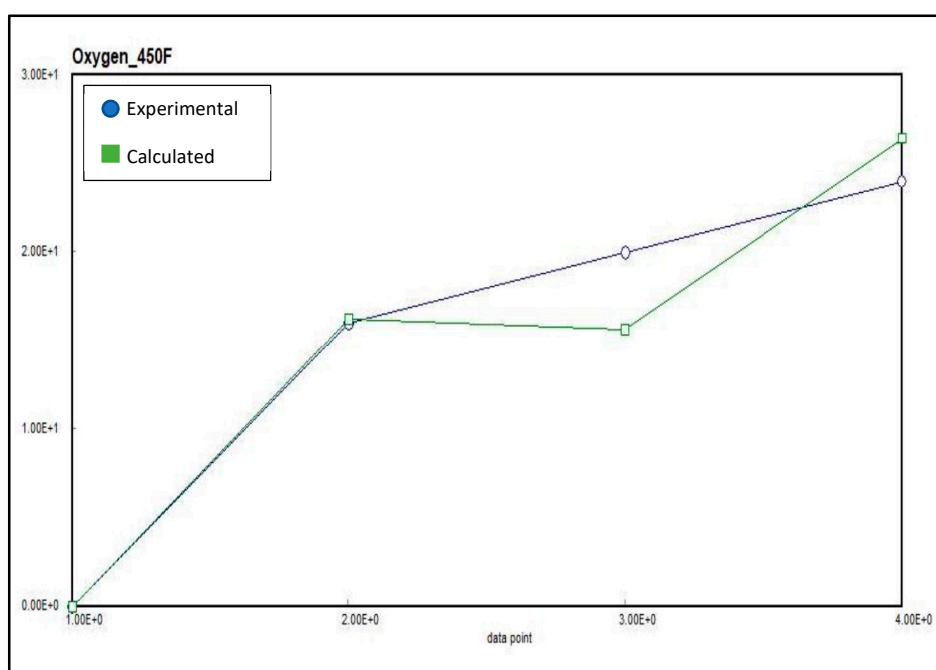

**Figure S2. a.** Polymath graphs showing the fitting of oxygen data at 232°C (experiment vs. calculated).

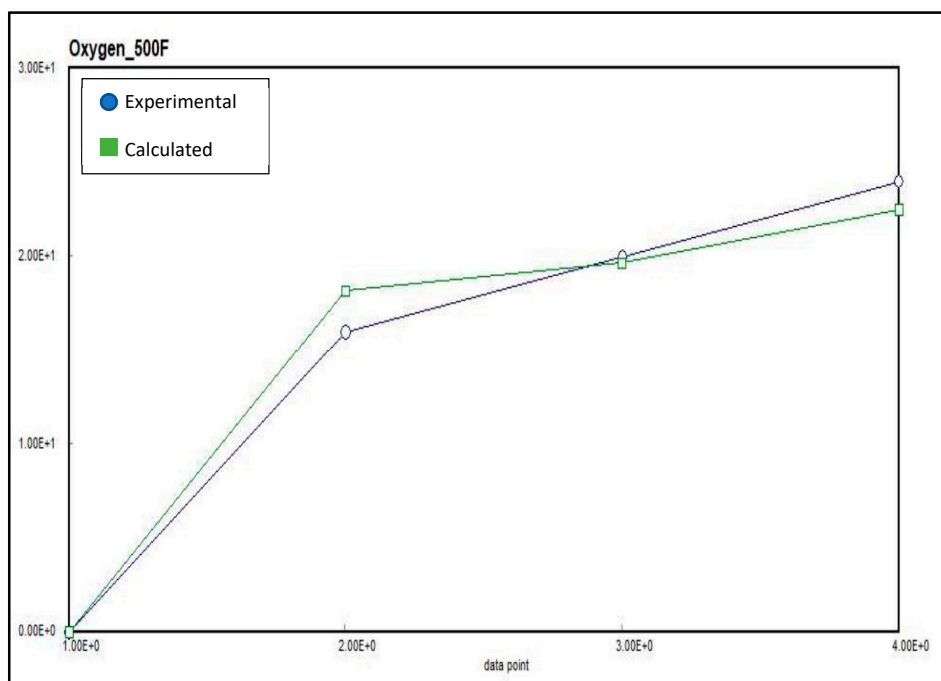

**Figure S2. b.** Polymath graphs showing the fitting of oxygen data at 260°C (experiment vs. calculated).

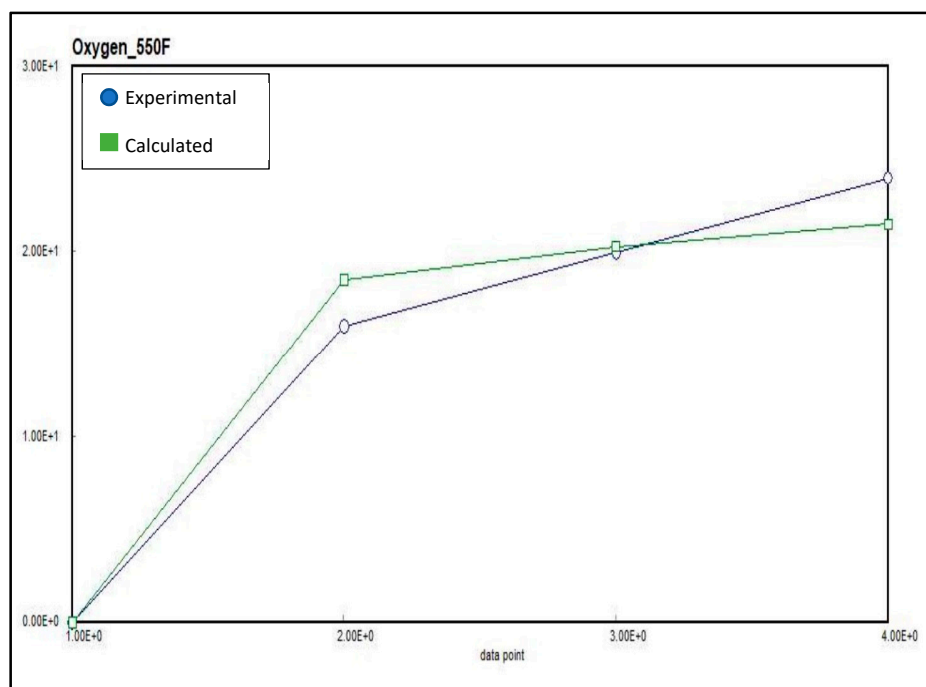

**Figure S2. c.** Polymath graphs showing the fitting of oxygen data at 288°C (experiment vs. calculated).

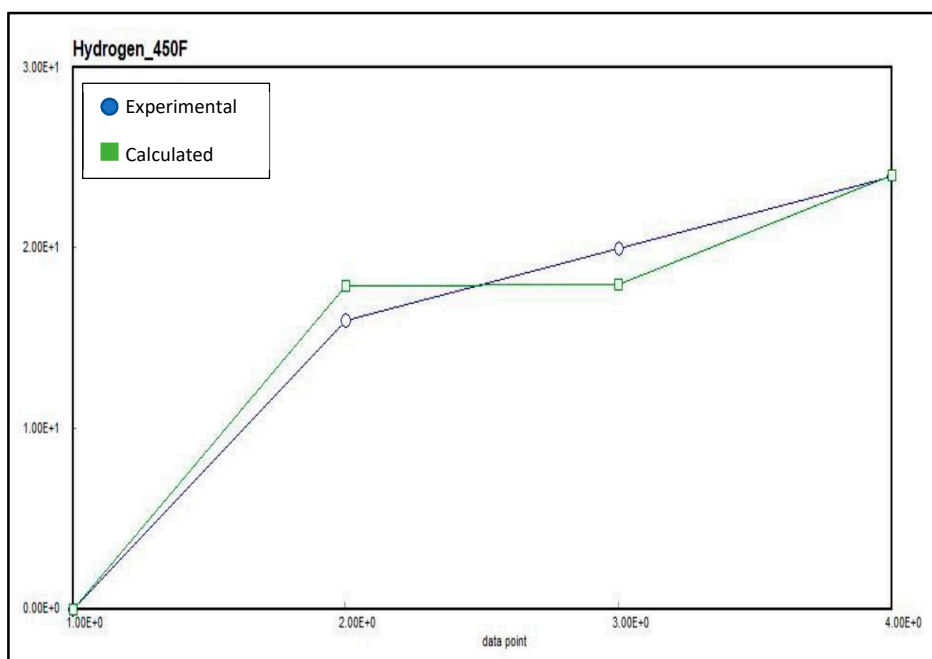

Figure S3. a. Polymath graphs showing the fitting of hydrogen data at 232°C (experiment vs. calculated).

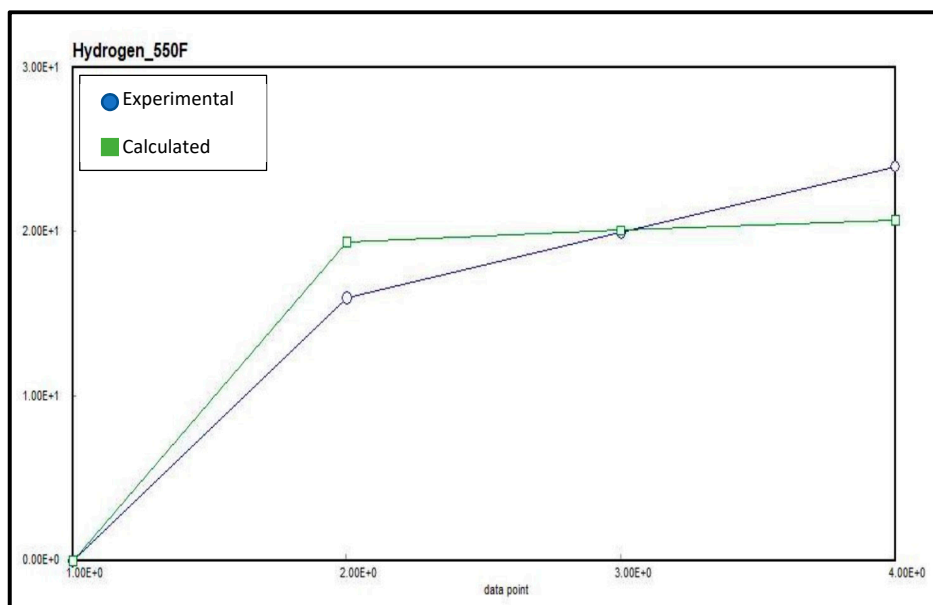

Figure S3. b. Polymath graphs showing the fitting of hydrogen data at 260°C (experiment vs. calculated).

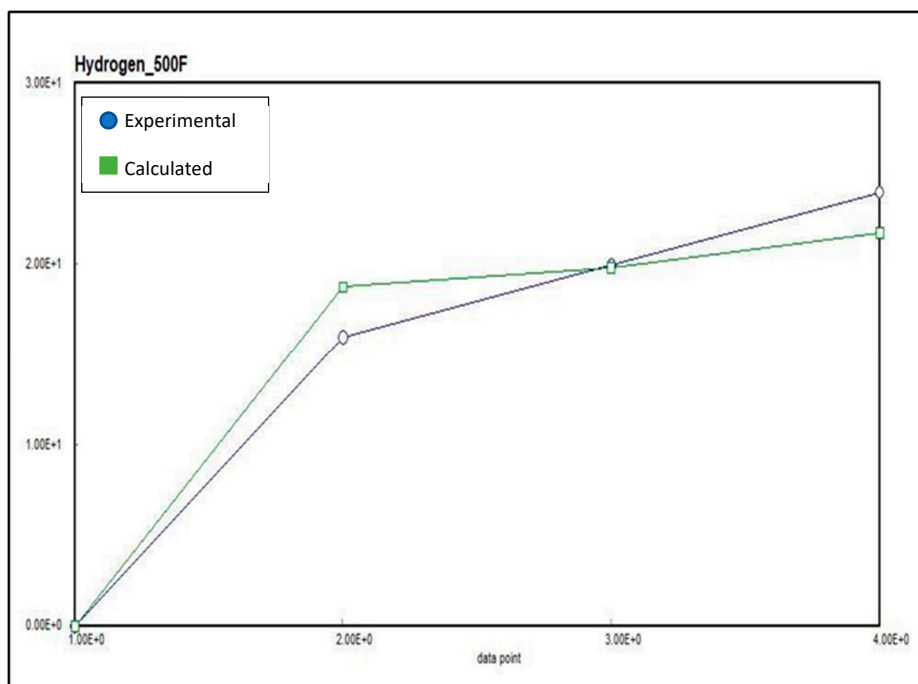

Figure S3. c. Polymath graphs showing the fitting of hydrogen data at 288°C (experiment vs. calculated).

**POLYMATH Report**  
Nonlinear Regression (L-M)

**Model:**  $\text{Time\_min} = (0.041629547^{(1-1.05)} - C\_mole^{(1-1.05)}) / (k^{(1-1.05)})$

| Variable | Initial guess | Value     | 95% confidence |
|----------|---------------|-----------|----------------|
| k        | 0.020848      | 0.0135851 | 0.0037667      |

**Nonlinear regression settings**  
Max # iterations = 64

**Precision**

|                    |           |
|--------------------|-----------|
| R <sup>2</sup>     | 0.9173389 |
| R <sup>2</sup> adj | 0.9173389 |
| Rmsd               | 1.309663  |
| Variance           | 9.14783   |

**General**

|             |   |
|-------------|---|
| Sample size | 4 |
| Model vars  | 1 |
| Indep vars  | 1 |
| Iterations  | 5 |

**Source data points and calculated data points**

|   | C_mole      | Time_min | Time_min calc | Delta Time_min |
|---|-------------|----------|---------------|----------------|
| 1 | 0.041629547 | 0        | 0             | 0              |
| 2 | 0.03499524  | 16       | 15.0452       | 0.9547986      |
| 3 | 0.034691175 | 20       | 15.80497      | 4.195028       |
| 4 | 0.030522534 | 24       | 26.98891      | -2.988911      |

Figure S4. Polymath report for carbon data regression at 232°C (450F).





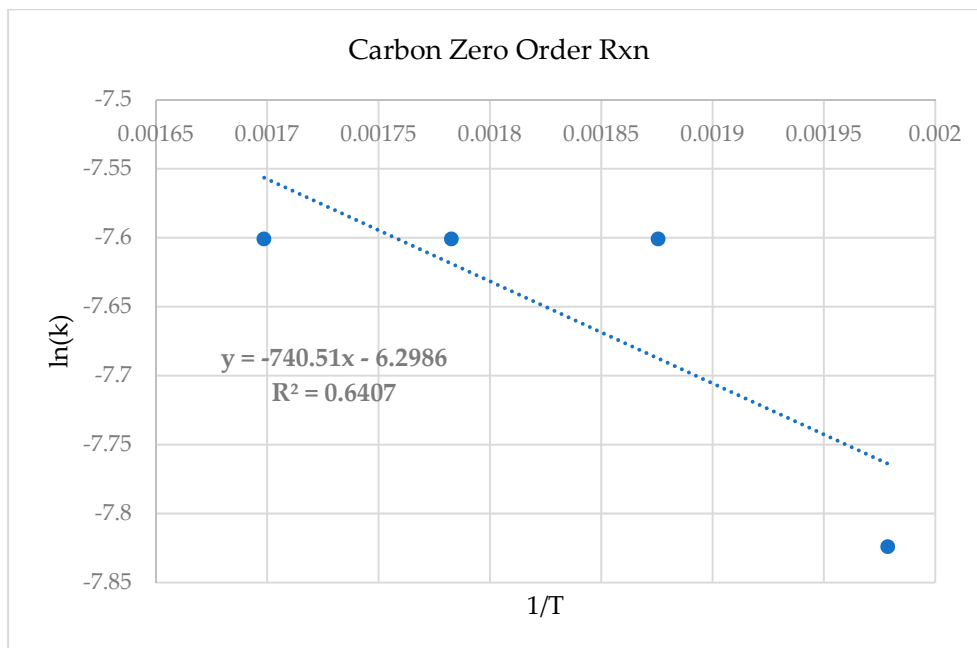

(a)

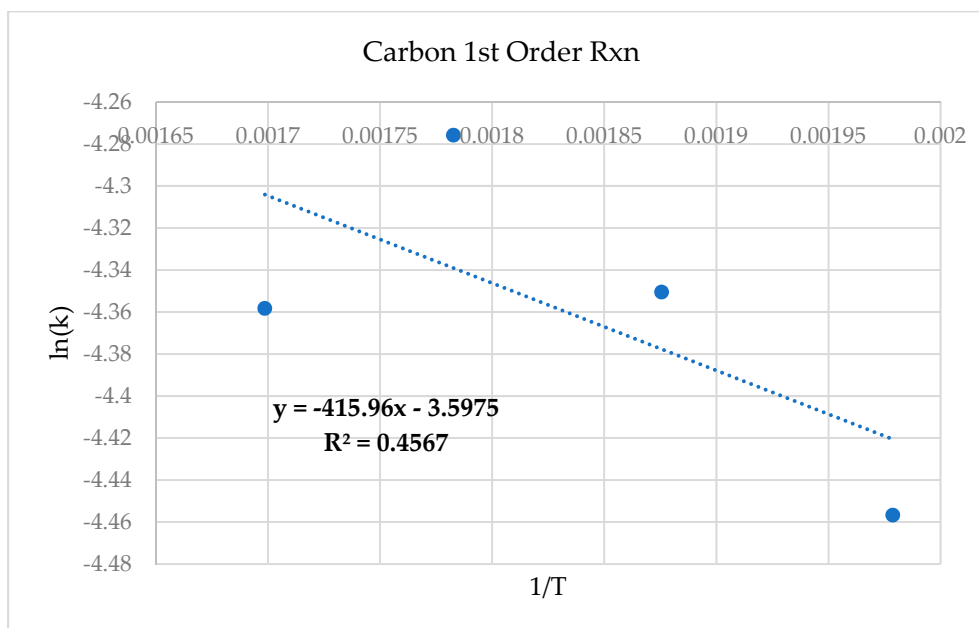

(b)

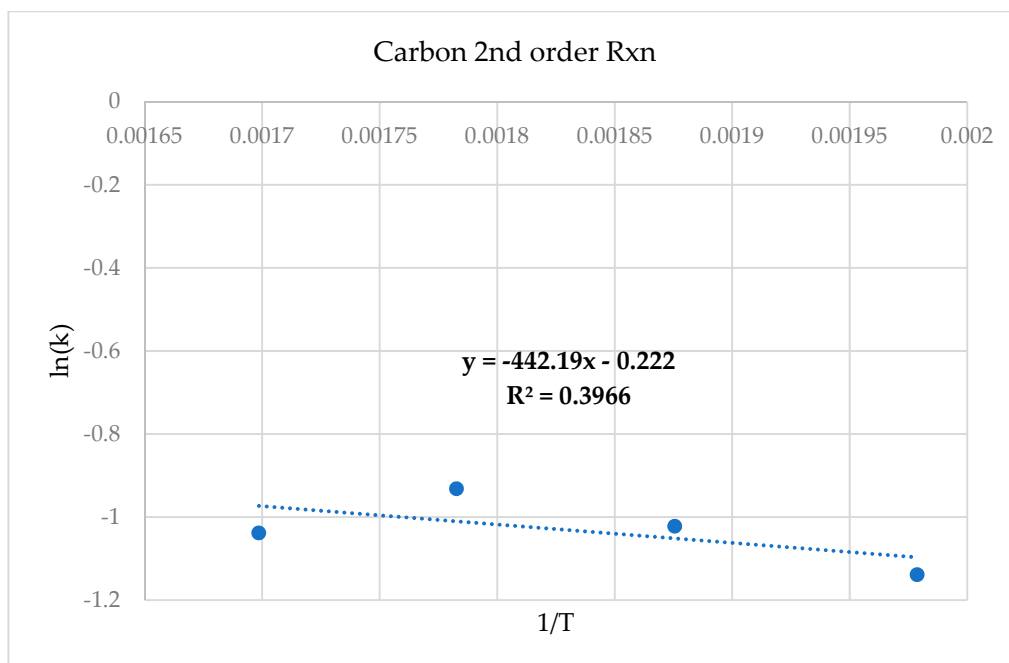

(c)

**Figure S7.** (a) Arrhenius plots for zero-order, (b) 1<sup>st</sup> order, and (c) 2<sup>nd</sup> order reactions of carbon obtained by the integral rate law method.

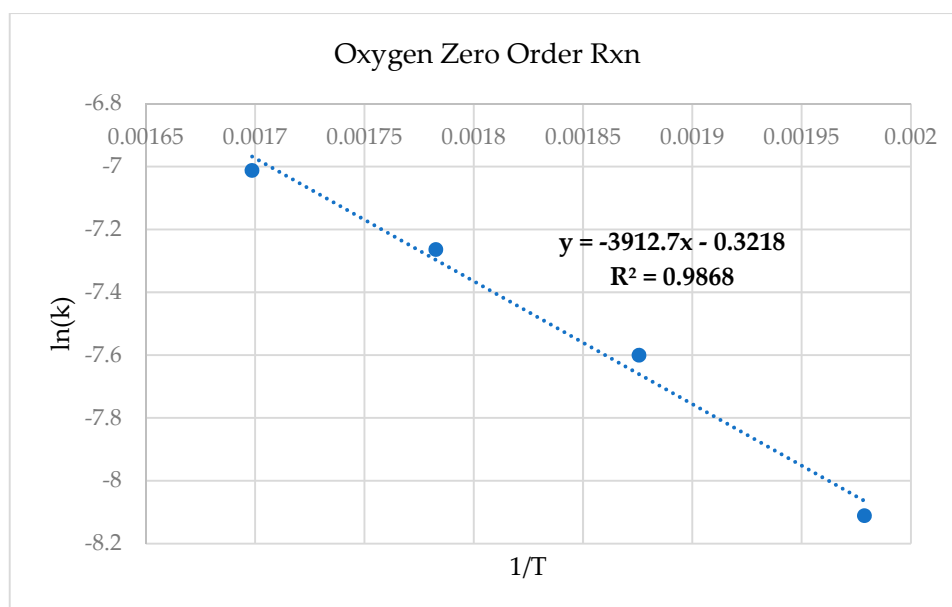

(a)

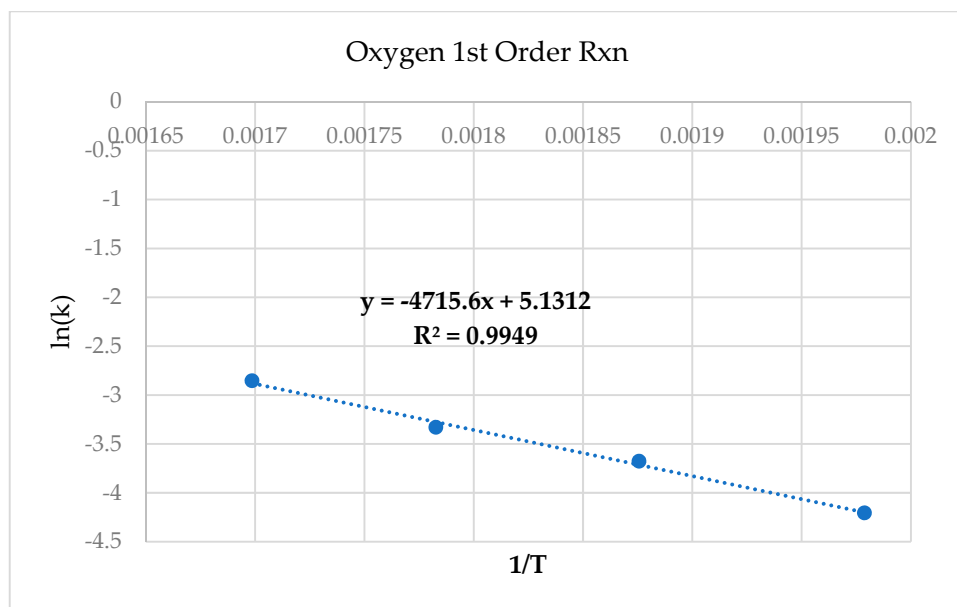

(b)

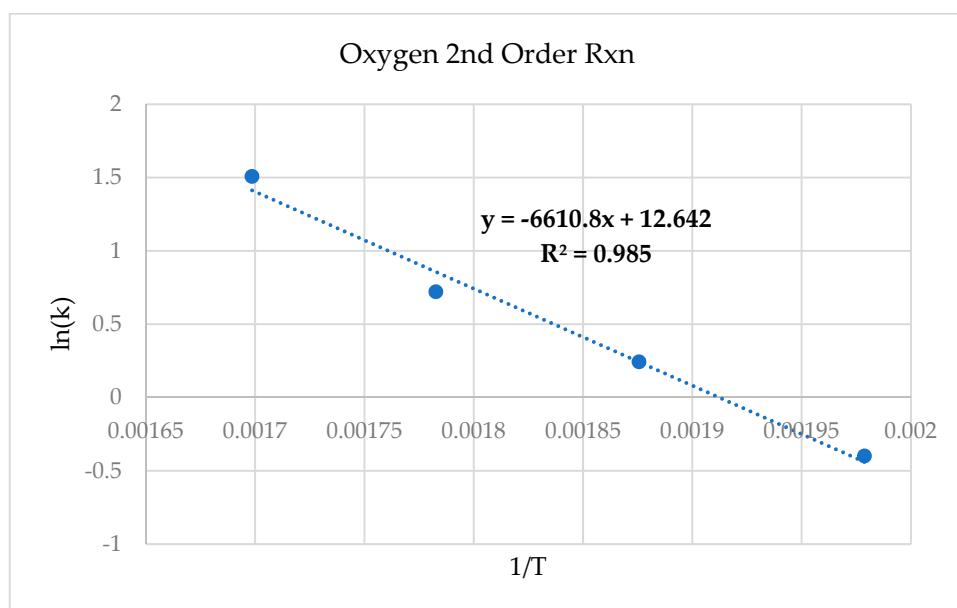

(c)

**Figure S8.** Arrhenius plots for (a) zero-order, (b) 1<sup>st</sup> order, and (c) 2<sup>nd</sup> order reactions of oxygen obtained by the integral rate law method.

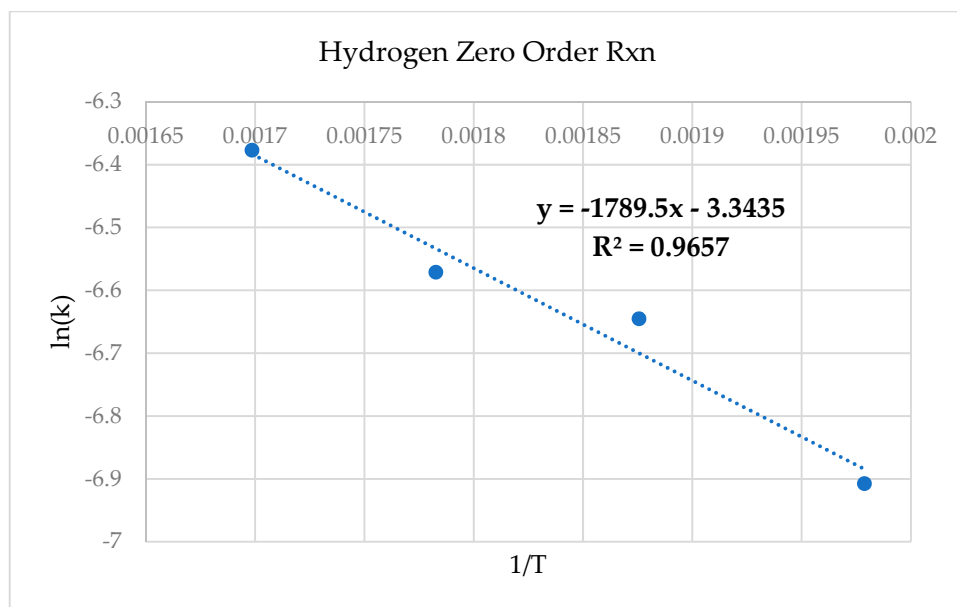

(a)

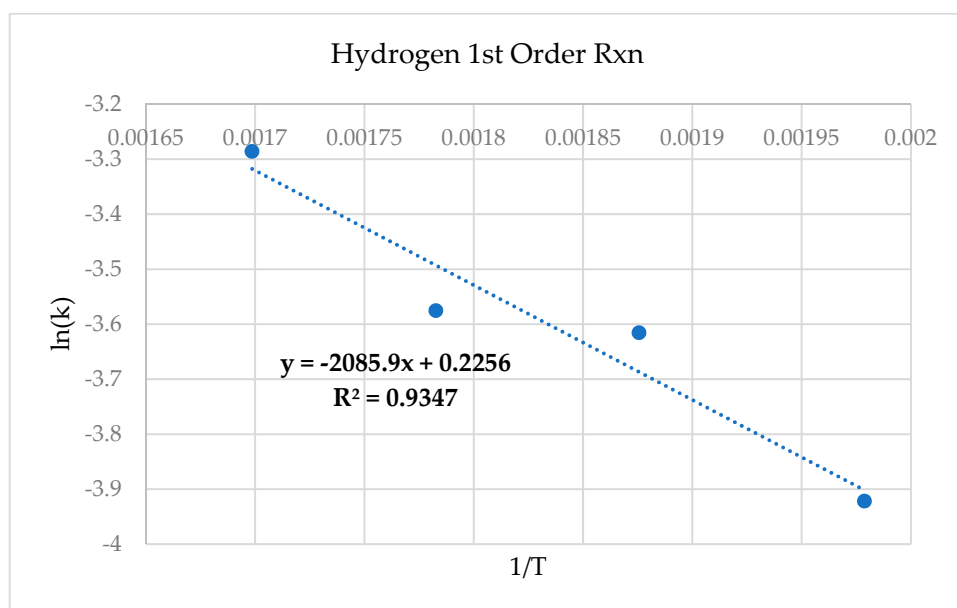

(b)

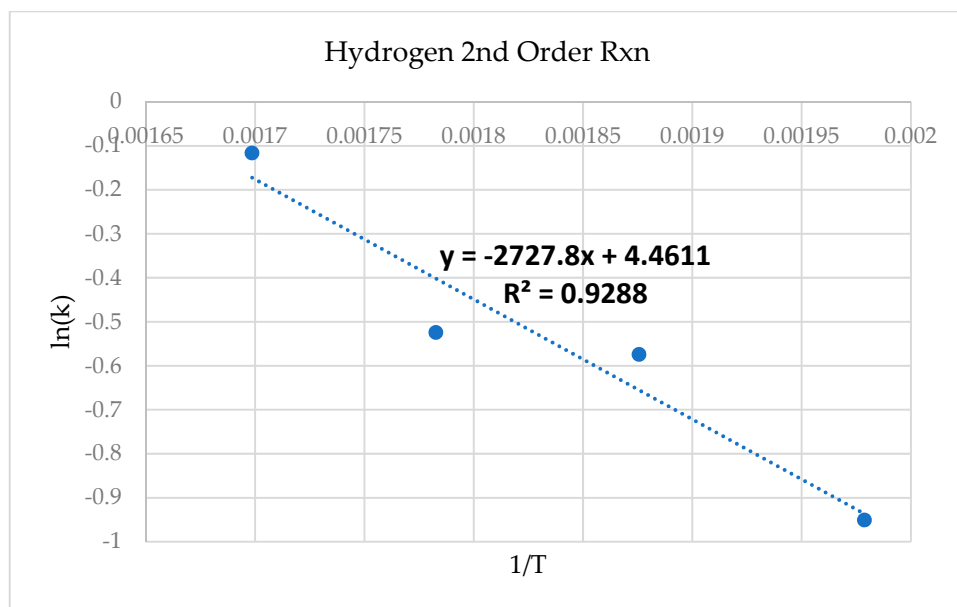

(c)

**Figure S9.** Arrhenius plots for (a) zero-order, (b) 1<sup>st</sup> order, and (c) 2<sup>nd</sup> order reactions of hydrogen obtained by the integral rate law method.

**Table S2.** Experimental results showing biomass composition after torrefaction at 232, 260, 288, and 316°C at 16 minutes residence time [13].

| 16mins       | 232°C  | 260°C | 288°C   | 316°C |
|--------------|--------|-------|---------|-------|
| C            | 50.6   | 53.1  | 56.05   | 65.67 |
| N            | 0.1    | 0.12  | 0.14    | 0.16  |
| H            | 5.84   | 5.7   | 5.56    | 4.74  |
| S            | 0.2    | 0.11  | 0.13    | 0.08  |
| O            | 43.26  | 40.97 | 38.12   | 29.35 |
| HHV, db      | 9014.7 | 9583  | 10143   | 12629 |
| Ash          | 0.112  | 0.16  | 0.1472  | 0.16  |
| Volatiles    | 76.28  | 74.87 | 68.75   | 49    |
| Fixed carbon | 19.108 | 21.12 | 26.6028 | 44.84 |

**Table S3.** Experimental results showing biomass composition after torrefaction at 232, 260, 288, and 316°C at 20 minutes residence time [13].

| <b>20mins</b> | <b>232°C</b> | <b>260°C</b> | <b>288°C</b> | <b>316°C</b> |
|---------------|--------------|--------------|--------------|--------------|
| C             | 50.33        | 53.65        | 61.75        | 64.89        |
| N             | 0.09         | 0.13         | 0.24         | 0.15         |
| H             | 5.86         | 5.69         | 5.29         | 5.13         |
| S             | 0.08         | 0.06         | 0.6          | 0.07         |
| O             | 43.64        | 40.47        | 32.12        | 29.76        |
| HHV. Db       | 9031         | 9499         | 10351        | 12303        |
| Ash           | 0.155        | 0.4          | 0.33         | 0.1629       |
| Volatiles     | 78           | 73           | 61.3         | 49.66        |
| Fixed carbon  | 17.945       | 23.16        | 33.67        | 42.6471      |

**Table S4.** Experimental results showing biomass composition after torrefaction at 232, 260, 288, and 316°C at 24 minutes residence time [13].

| <b>24mins</b> | <b>232°C</b> | <b>260°C</b> | <b>288°C</b> | <b>316°C</b> |
|---------------|--------------|--------------|--------------|--------------|
| C             | 53.13        | 58.94        | 61.9         | 75.5         |
| N             | 0.21         | 0.22         | 0.03         | 0.6          |
| H             | 5.65         | 5.38         | 6.2          | 5.5          |
| S             | 0.322        | 0.24         | 0            | 0            |
| O             | 40.688       | 35.22        | 31.5         | 18.4         |
| HHV, db       | 9555         | 10557        | 12598        | 12874        |
| Ash           | 0.1518       | 0.0967       | 0.28         | 0.17         |
| Volatiles     | 74           | 63           | 45.36        | 46.82        |
| Fixed carbon  | 22.0982      | 32.1033      | 53.76        | 52.94        |

## References

1. Bourgois, J.; Guyonnet, R. Characterization and Analysis of Torrefied Wood. *Wood Sci. Technol.* **1988**, *22*, 143–155, doi:10.1007/BF00355850.
2. Prins, M.J.; Ptasiński, K.J.; Janssen, F.J.J.G. Torrefaction of Wood. Part 2. Analysis of Products. *J. Anal. Appl. Pyrolysis* **2006**, *77*, 35–40, doi:10.1016/j.jaap.2006.01.001.
3. Repellin, V.; Govin, A.; Rolland, M.; Guyonnet, R. Modelling Anhydrous Weight Loss of Wood Chips during Torrefaction in a Pilot Kiln. *Biomass and Bioenergy* **2010**, *34*, 602–609, doi:10.1016/j.BIOMBIOE.2010.01.002.
4. Nocquet, T.; Dupont, C.; Commandre, J.M.; Grateau, M.; Thiery, S.; Salvador, S. Volatile Species Release during Torrefaction of Wood and Its Macromolecular Constituents: Part 1-Experimental Study. *Energy* **2014**, *72*, 180–187, doi:10.1016/J.ENERGY.2014.02.061.
5. Deng, J.; Wang, G. jun; Kuang, J. hong; Zhang, Y. liang; Luo, Y. hao Pretreatment of Agricultural Residues for Co-Gasification via Torrefaction. *J. Anal. Appl. Pyrolysis* **2009**, *86*, 331–337, doi:10.1016/J.JAAP.2009.08.006.
6. Candelier, K.; Chaouch, M.; Dumaray, S.; Pétrissans, A.; Pétrissans, M.; Gérardin, P. Utilization of Thermodesorption Coupled to GC–MS to Study Stability of Different Wood Species to Thermodegradation. *J. Anal. Appl. Pyrolysis* **2011**, *92*, 376–383, doi:10.1016/J.JAAP.2011.07.010.
7. Chen, W.H.; Hsu, H.C.; Lu, K.M.; Lee, W.J.; Lin, T.C. Thermal Pretreatment of Wood (Lauan) Block by Torrefaction and Its Influence on the Properties of the Biomass. *Energy* **2011**, *36*, 3012–3021, doi:10.1016/J.ENERGY.2011.02.045.
8. Shang, L.; Ahrenfeldt, J.; Holm, J.K.; Barsberg, S.; Zhang, R.Z.; Luo, Y.H.; Egsgaard, H.; Henriksen, U.B. Intrinsic Kinetics and Devolatilization of Wheat Straw during Torrefaction. *J. Anal. Appl. Pyrolysis* **2013**, *100*, 145–152, doi:10.1016/J.JAAP.2012.12.010.
9. Portilho, G.R.; de Castro, V.R.; Carneiro, A. de C.O.; Zanoncio, J.C.; Zanoncio, A.J.V.; Surdi, P.G.; Gominho, J.; Araújo, S. de O. Potential of Briquette Produced with Torrefied Agroforestry Biomass to Generate Energy. *For. 2020, Vol. 11, Page 1272* **2020**, *11*, 1272, doi:10.3390/F11121272.
10. Anca-Couce, A.; Mehrabian, R.; Scharler, R.; Obernberger, I. Kinetic Scheme to Predict Product Composition of Biomass Torrefaction. *Chem. Eng. Trans.* **2014**, *37*, 43–48, doi:10.3303/CET1437008.
11. Commandré, J.M.; Leboeuf, A. Volatile Yields and Solid Grindability after Torrefaction of Various Biomass Types. *Environ. Prog. Sustain. Energy* **2015**, *34*, 1180–1186, doi:10.1002/EP.12073.
12. Lê Thành, K.; Commandré, J.M.; Valette, J.; Volle, G.; Meyer, M. Detailed Identification and Quantification of the Condensable Species Released during Torrefaction of Lignocellulosic Biomasses. *Fuel Process. Technol.* **2015**, *139*, 226–235, doi:10.1016/J.FUPROC.2015.07.001.
13. Prithvi Morampudi Pilot Scale Evaluation of Torrefaction Operating Process Parameters on Thermal Properties of Biomass, University of Louisiana at Lafayette, 2019.
